# Supplementary material for: Adsorption of water induces a reversible structural phase transition and colour change in new nickel(ii) macrocyclic complexes forming flexible supramolecular networks
Source: Royal Society of Chemistry journal article supplement (doi:10.1039/c6nj01621a), 2016-01-01
Supplement: c6nj01621a1.pdf [file c6nj01621a1.pdf]

**Adsorption of water induces a reversible structural phase transition and colour change in new nickel (II) macrocyclic complexes forming flexible supramolecular networks**

Brenda Lizette Ruiz-Herrera<sup>a</sup>, Marcos Flores-Álamo<sup>b</sup>, Rubén Alfredo Toscano<sup>c</sup>, Roberto Escudero<sup>a</sup>, Martha Elena Sosa-Torres<sup>b\*</sup>

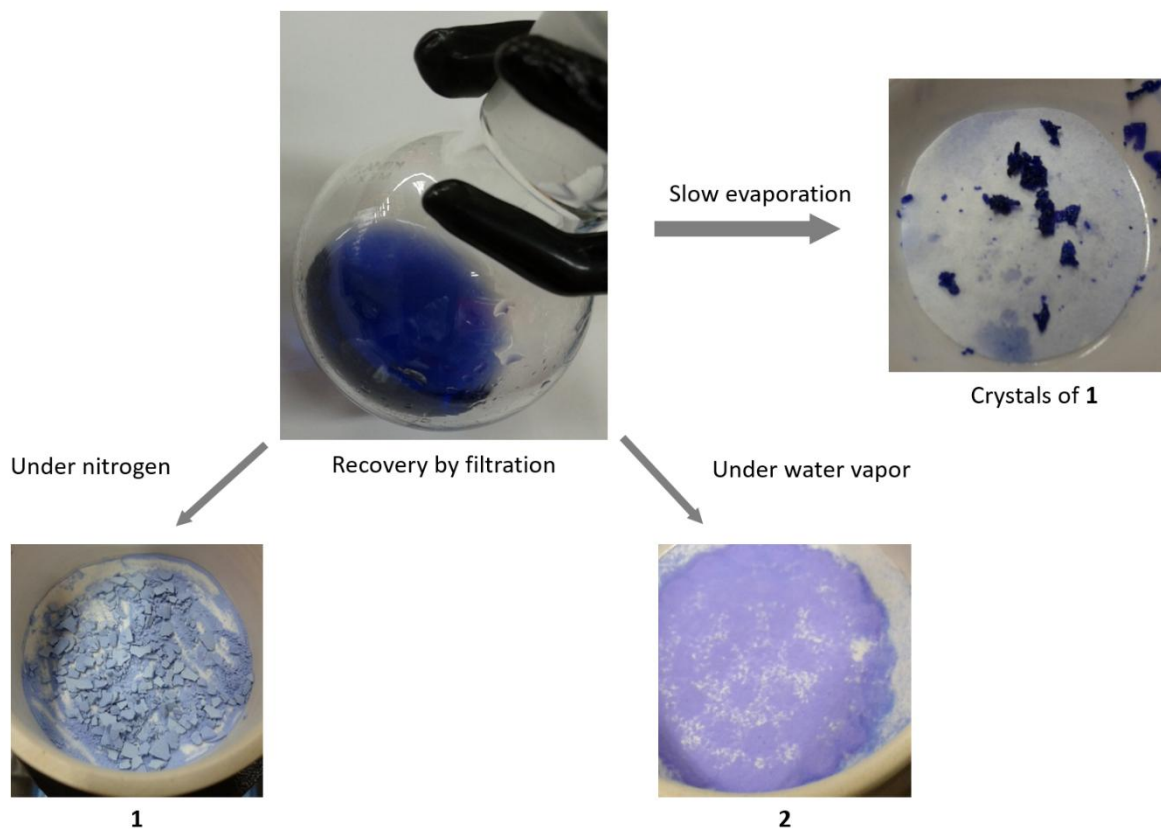

Fig. S1: Schematic representation of the recovery of products 1 and 2.

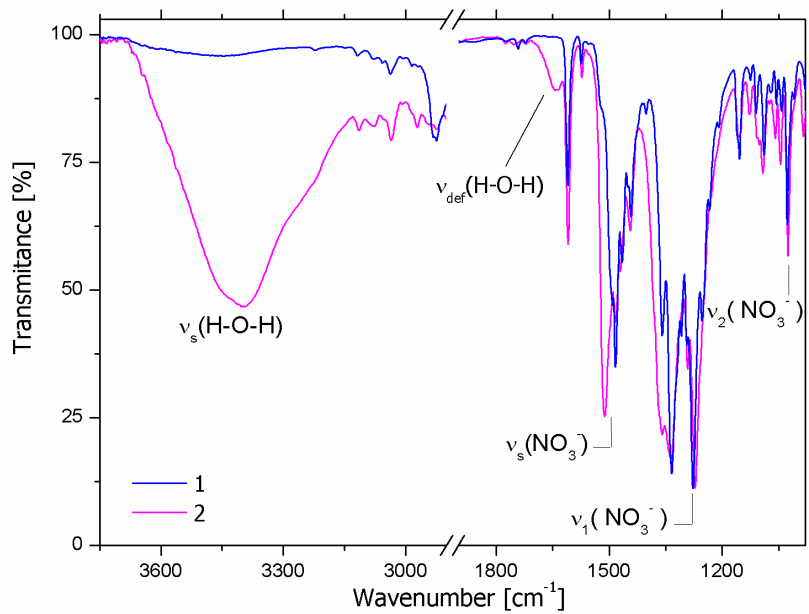

**Fig. S2:** Mid-infrared spectra of compounds **1** and **2**.

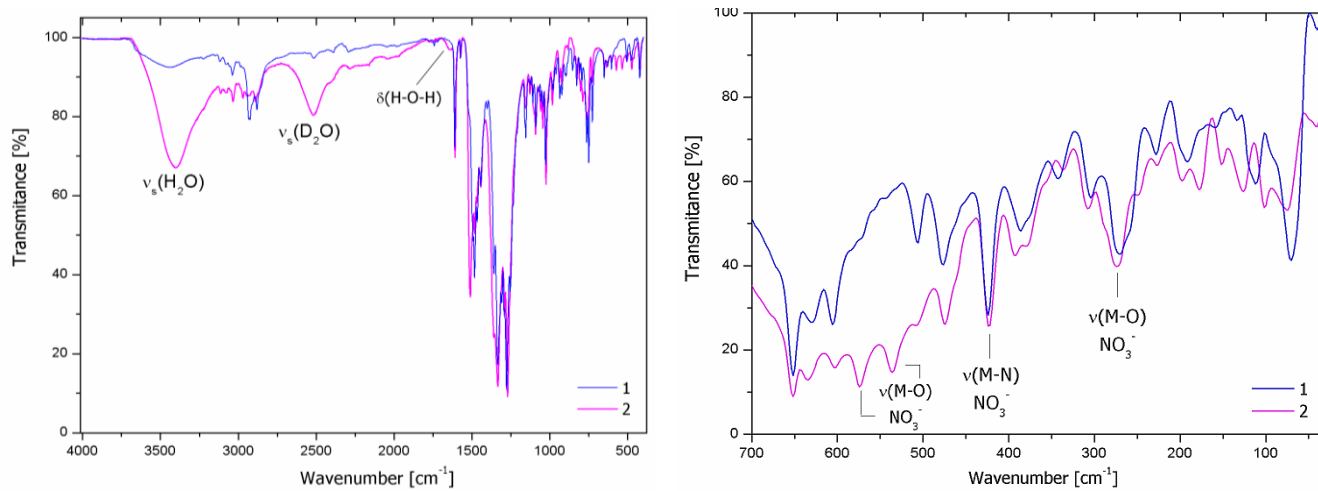

**Fig. S3:** Comparison of mid-infrared spectra (left) and far-infrared spectra (right) of deuterated compounds **1** and **2**.

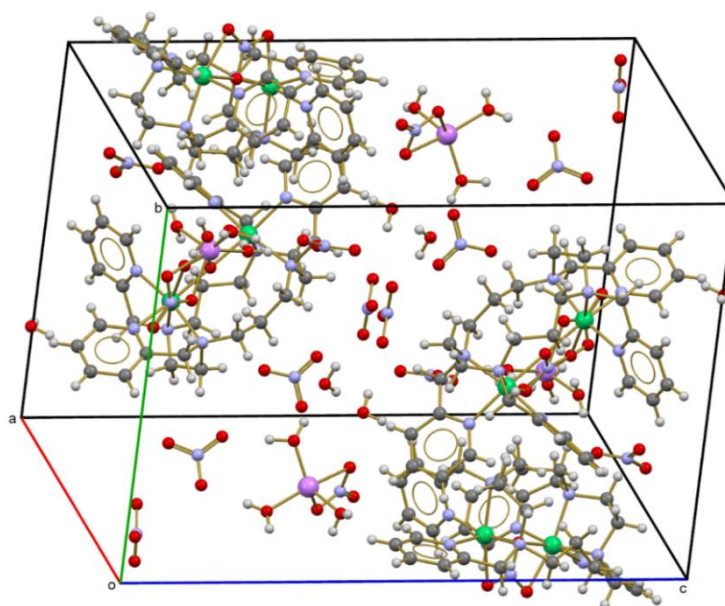

**Fig. S4:** a) Unit cell of compound **1**. Perspective view of the molecular structure, C (black); H (white); O (red); N (blue); Ni (green) and Li (pink). Thermal ellipsoids are shown at the 50% probability level.

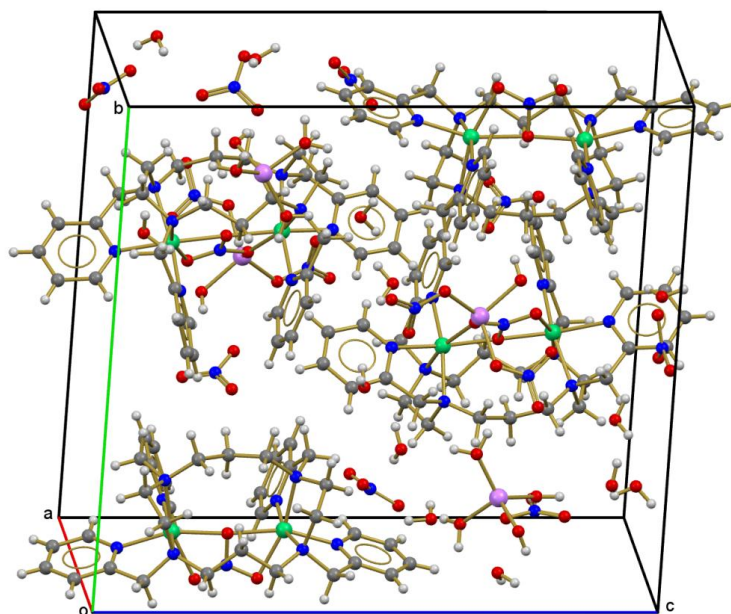

**Fig. S5:** a) Unit cell of compound **2**. Perspective view of the molecular structure, C (black); H (white); O (red); N (blue); Ni (green) and Li (pink). Thermal ellipsoids are shown at the 50% probability level.

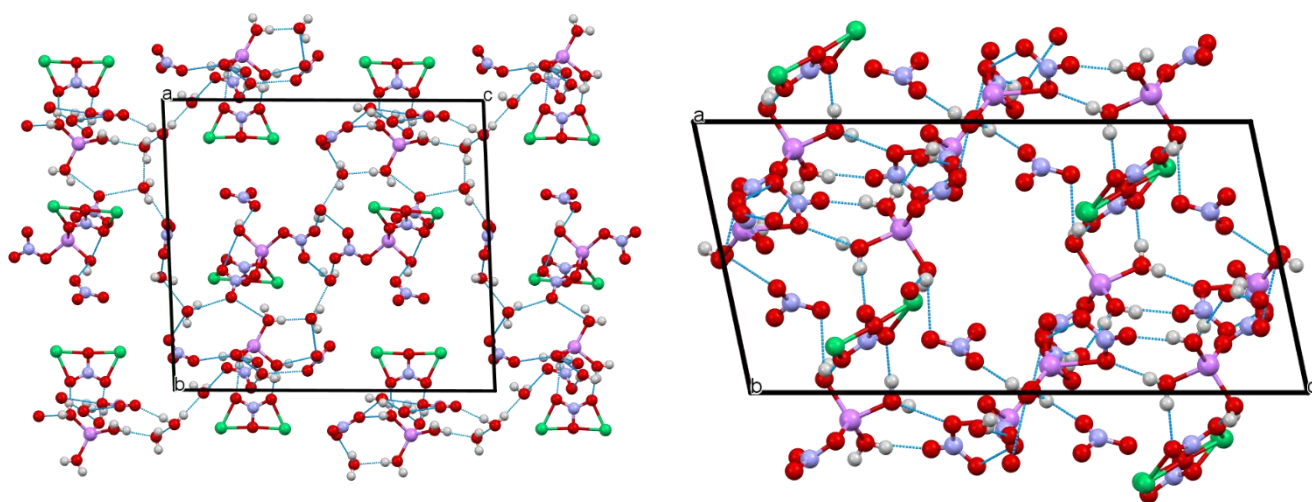

**Fig. S6:** Perspective of the intermolecular interactions present in compound **2**, along the planes b-c (left) and a-c (right). For clarity only nitrates, water molecules and lithium complexes are shown.

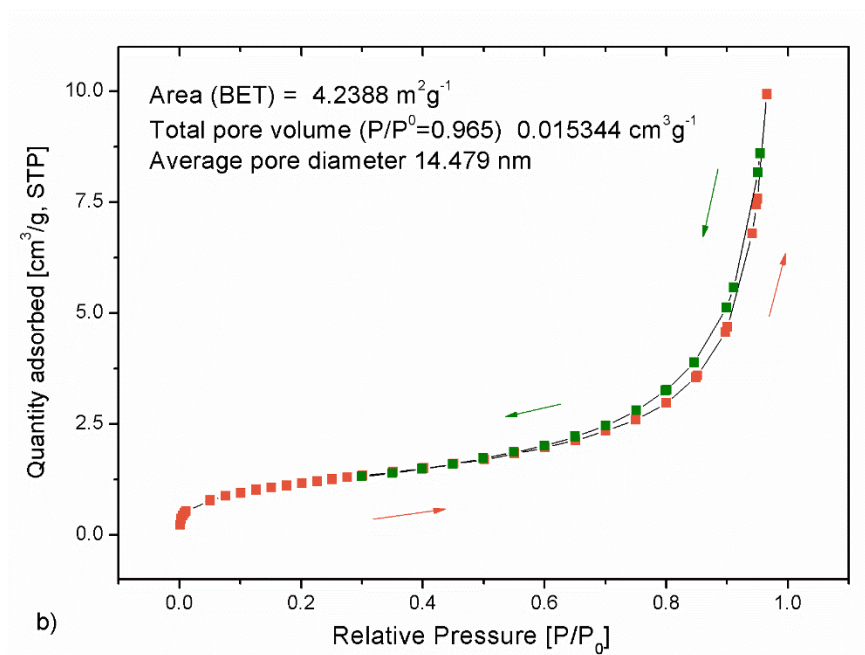

**Fig. S7:** Adsorption-desorption isotherms of compound **1**, measured at relative low pressure, under  $\text{N}_2$ .

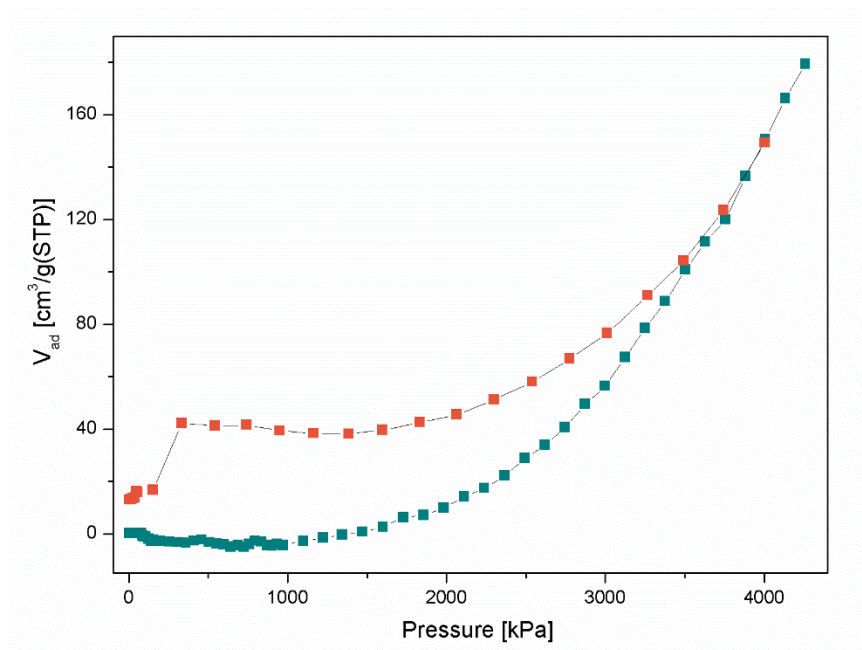

Fig. S8: Adsorption-desorption isotherms of compound **1**, measured at high pressure, under CO<sub>2</sub>.

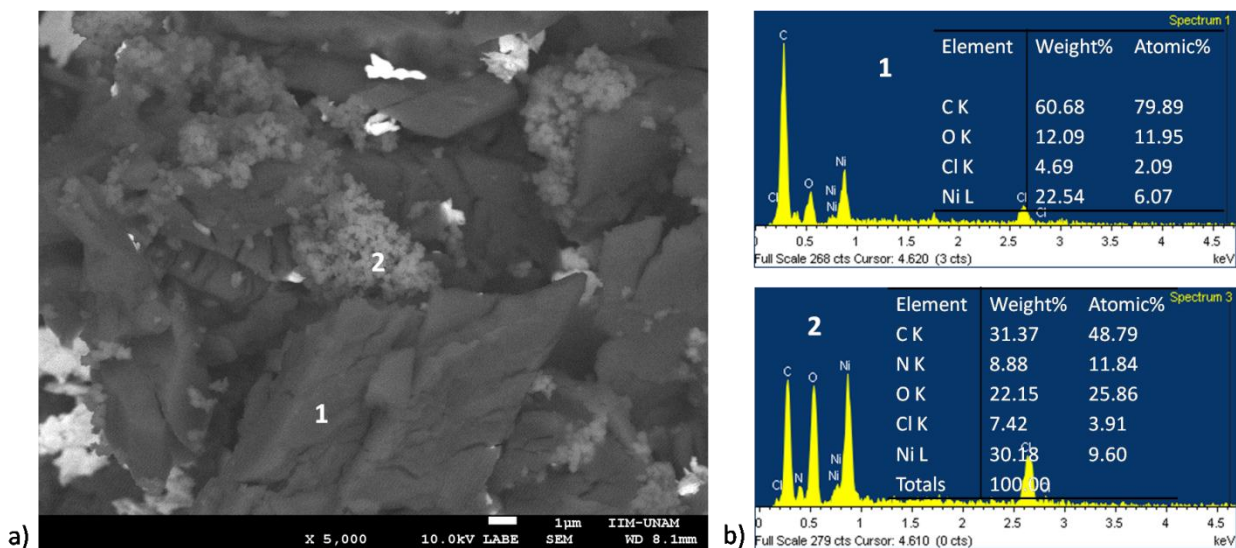

Fig. S9: a) Backscattered electron image for the violet binuclear nickel (II) compound (after adsorption process). b) Elemental analysis made by EDS. The different phases observed correspond to compounds **1** and **2**.

**Table S1.** Selected bond lengths [Å] and angles [°] for the equivalent nickel atoms in compound **1**, and the non-equivalent nickel atoms in compound **2**. Comparison of centres Ni(1) and Ni(2) of compound **1** with centres Ni(1) and Ni(2) of compound **2**.

| <b>1</b>         |            | <b>2</b>            |          |
|------------------|------------|---------------------|----------|
| Bond lengths [Å] |            |                     |          |
| O(1)-Ni(1)       | 2.072(2)   | Ni(2)-O(203)        | 2.077(6) |
| O(2)-Ni(1)       | 2.164(2)   | Ni(1)-O(201)        | 2.167(6) |
| O(1)-Ni(2)       | 2.060(2)   | Ni(1)-O(203)        | 2.068(6) |
| O(3)-Ni(2)       | 2.165(2)   | Ni(2)-O(202)        | 2.154(6) |
| Ni(1)-N(5)       | 2.060(3)   | Ni(1)-N(15)         | 2.071(7) |
| Ni(1)-N(6)       | 2.068(3)   | Ni(1)-N(22)         | 2.087(8) |
| Ni(1)-N(1)       | 2.105(3)   | Ni(1)-N(4)          | 2.131(8) |
| Ni(1)-N(2)       | 2.147(3)   | Ni(1)-N(1)          | 2.137(8) |
| Ni(2)-N(8)       | 2.049(3)   | Ni(2)-N(29)         | 2.050(8) |
| Ni(2)-N(7)       | 2.078(3)   | Ni(2)-N(36)         | 2.094(7) |
| Ni(2)-N(4)       | 2.115(3)   | Ni(2)-N(8)          | 2.127(8) |
| Ni(2)-N(3)       | 2.134(3)   | Ni(2)-N(11)         | 2.157(8) |
| Angles [°]       |            |                     |          |
| Ni(2)-O(1)-Ni(1) | 174.92(13) | Ni(1)-O(203)-Ni(2)  | 174.4(4) |
| N(5)-Ni(1)-N(6)  | 93.90(12)  | O(203)-Ni(1)-N(15)  | 162.7(3) |
| N(5)-Ni(1)-O(1)  | 91.88(10)  | O(203)-Ni(1)-N(22)  | 90.7(3)  |
| N(6)-Ni(1)-O(1)  | 161.37(11) | N(15)-Ni(1)-N(22)   | 94.9(3)  |
| N(5)-Ni(1)-N(1)  | 81.60(12)  | O(203)-Ni(1)-N(4)   | 101.1(3) |
| N(6)-Ni(1)-N(1)  | 95.41(11)  | N(15)-Ni(1)-N(4)    | 96.1(3)  |
| O(1)-Ni(1)-N(1)  | 102.96(10) | N(22)-Ni(1)-N(4)    | 80.6(3)  |
| N(5)-Ni(1)-N(2)  | 165.51(12) | O(203)-Ni(1)-N(1)   | 97.4(3)  |
| N(6)-Ni(1)-N(2)  | 81.47(11)  | N(15)-Ni(1)-N(1)    | 81.3(3)  |
| O(1)-Ni(1)-N(2)  | 96.82(10)  | N(22)-Ni(1)-N(1)    | 164.3(3) |
| N(1)-Ni(1)-N(2)  | 85.17(12)  | N(4)-Ni(1)-N(1)     | 84.6(3)  |
| O(1)-Ni(1)-O(2)  | 62.15(9)   | O(203)-Ni(1)-O(201) | 62.5(2)  |
| N(5)-Ni(1)-O(2)  | 97.68(11)  | N(15)-Ni(1)-O(201)  | 100.4(3) |
| N(6)-Ni(1)-O(2)  | 99.49(10)  | N(22)-Ni(1)-O(201)  | 98.7(3)  |
| N(1)-Ni(1)-O(2)  | 165.10(10) | N(4)-Ni(1)-O(201)   | 163.5(2) |
| N(2)-Ni(1)-O(2)  | 96.63(11)  | N(1)-Ni(1)-O(201)   | 97.0(3)  |
| Angles [°]       |            |                     |          |
| N(8)-Ni(2)-N(7)  | 92.34(11)  | N(29)-Ni(2)-O(203)  | 94.4(3)  |
| N(8)-Ni(2)-O(1)  | 91.24(10)  | N(29)-Ni(2)-N(36)   | 91.2(3)  |
| O(1)-Ni(2)-N(7)  | 164.19(10) | O(203)-Ni(2)-N(36)  | 162.3(3) |
| N(8)-Ni(2)-N(4)  | 82.33(12)  | N(29)-Ni(2)-N(8)    | 82.4(3)  |
| N(7)-Ni(2)-N(4)  | 95.29(11)  | O(203)-Ni(2)-N(8)   | 101.4(3) |
| O(1)-Ni(2)-N(4)  | 100.45(10) | N(36)-Ni(2)-N(8)    | 96.0(3)  |
| N(8)-Ni(2)-N(3)  | 166.09(11) | N(29)-Ni(2)-N(11)   | 164.4(3) |
| N(7)-Ni(2)-N(3)  | 80.95(11)  | O(203)-Ni(2)-N(11)  | 96.3(3)  |
| O(1)-Ni(2)-N(3)  | 98.52(10)  | N(36)-Ni(2)-N(11)   | 81.9(3)  |
| N(4)-Ni(2)-N(3)  | 86.15(12)  | N(8)-Ni(2)-N(11)    | 84.4(3)  |
| O(1)-Ni(2)-O(3)  | 62.69(9)   | N(29)-Ni(2)-O(202)  | 96.5(3)  |
| N(8)-Ni(2)-O(3)  | 97.58(10)  | O(203)-Ni(2)-O(202) | 62.3(2)  |
| N(7)-Ni(2)-O(3)  | 101.56(10) | N(36)-Ni(2)-O(202)  | 100.4(3) |
| N(4)-Ni(2)-O(3)  | 163.14(10) | N(8)-Ni(2)-O(202)   | 163.6(2) |
| N(3)-Ni(2)-O(3)  | 95.71(11)  | O(202)-Ni(2)-N(11)  | 98.5(3)  |

**Table S2.** Selected bond lengths [Å] and angles [°] for the lithium entities in compounds **1** and **2**.

| <b>1</b>          |          | <b>2</b>            |           |
|-------------------|----------|---------------------|-----------|
| Bond lengths [Å]  |          |                     |           |
| O(3W)-Li(1)       | 1.972(8) | Li(1)-O(201)        | 1.972(17) |
| O(4W)-Li(1)       | 1.921(8) | Li(1)-O(1)          | 1.983(19) |
| O(5W)-Li(1)       | 1.973(7) | Li(1)-O(216)        | 2.01(2)   |
| O(7A)-Li(1)       | 2.429(9) | Li(1)-O(213)        | 2.03(2)   |
| O(9A)-Li(1)       | 2.110(8) |                     |           |
| Angles [°]        |          |                     |           |
| O(4W)-Li(1)-O(3W) | 127.7(4) | O(201)-Li(1)-O(1)   | 101.1(8)  |
| O(3W)-Li(1)-O(5W) | 97.3(3)  | O(201)-Li(1)-O(216) | 125.8(10) |
| O(5W)-Li(1)-O(9A) | 99.8(3)  | O(1)-Li(1)-O(213)   | 113.2(9)  |
| O(4W)-Li(1)-O(7A) | 89.9(3)  | O(216)-Li(1)-O(213) | 112.4(8)  |
| O(9A)-Li(1)-O(7A) | 54.7(2)  |                     |           |
